# Supplementary material for: System for fast lexical and phonetic spoken term detection in a Czech cultural heritage archive
Source: Springer Nature journal article supplement (doi:10.1186/1687-4722-2011-10), 2011-12-01

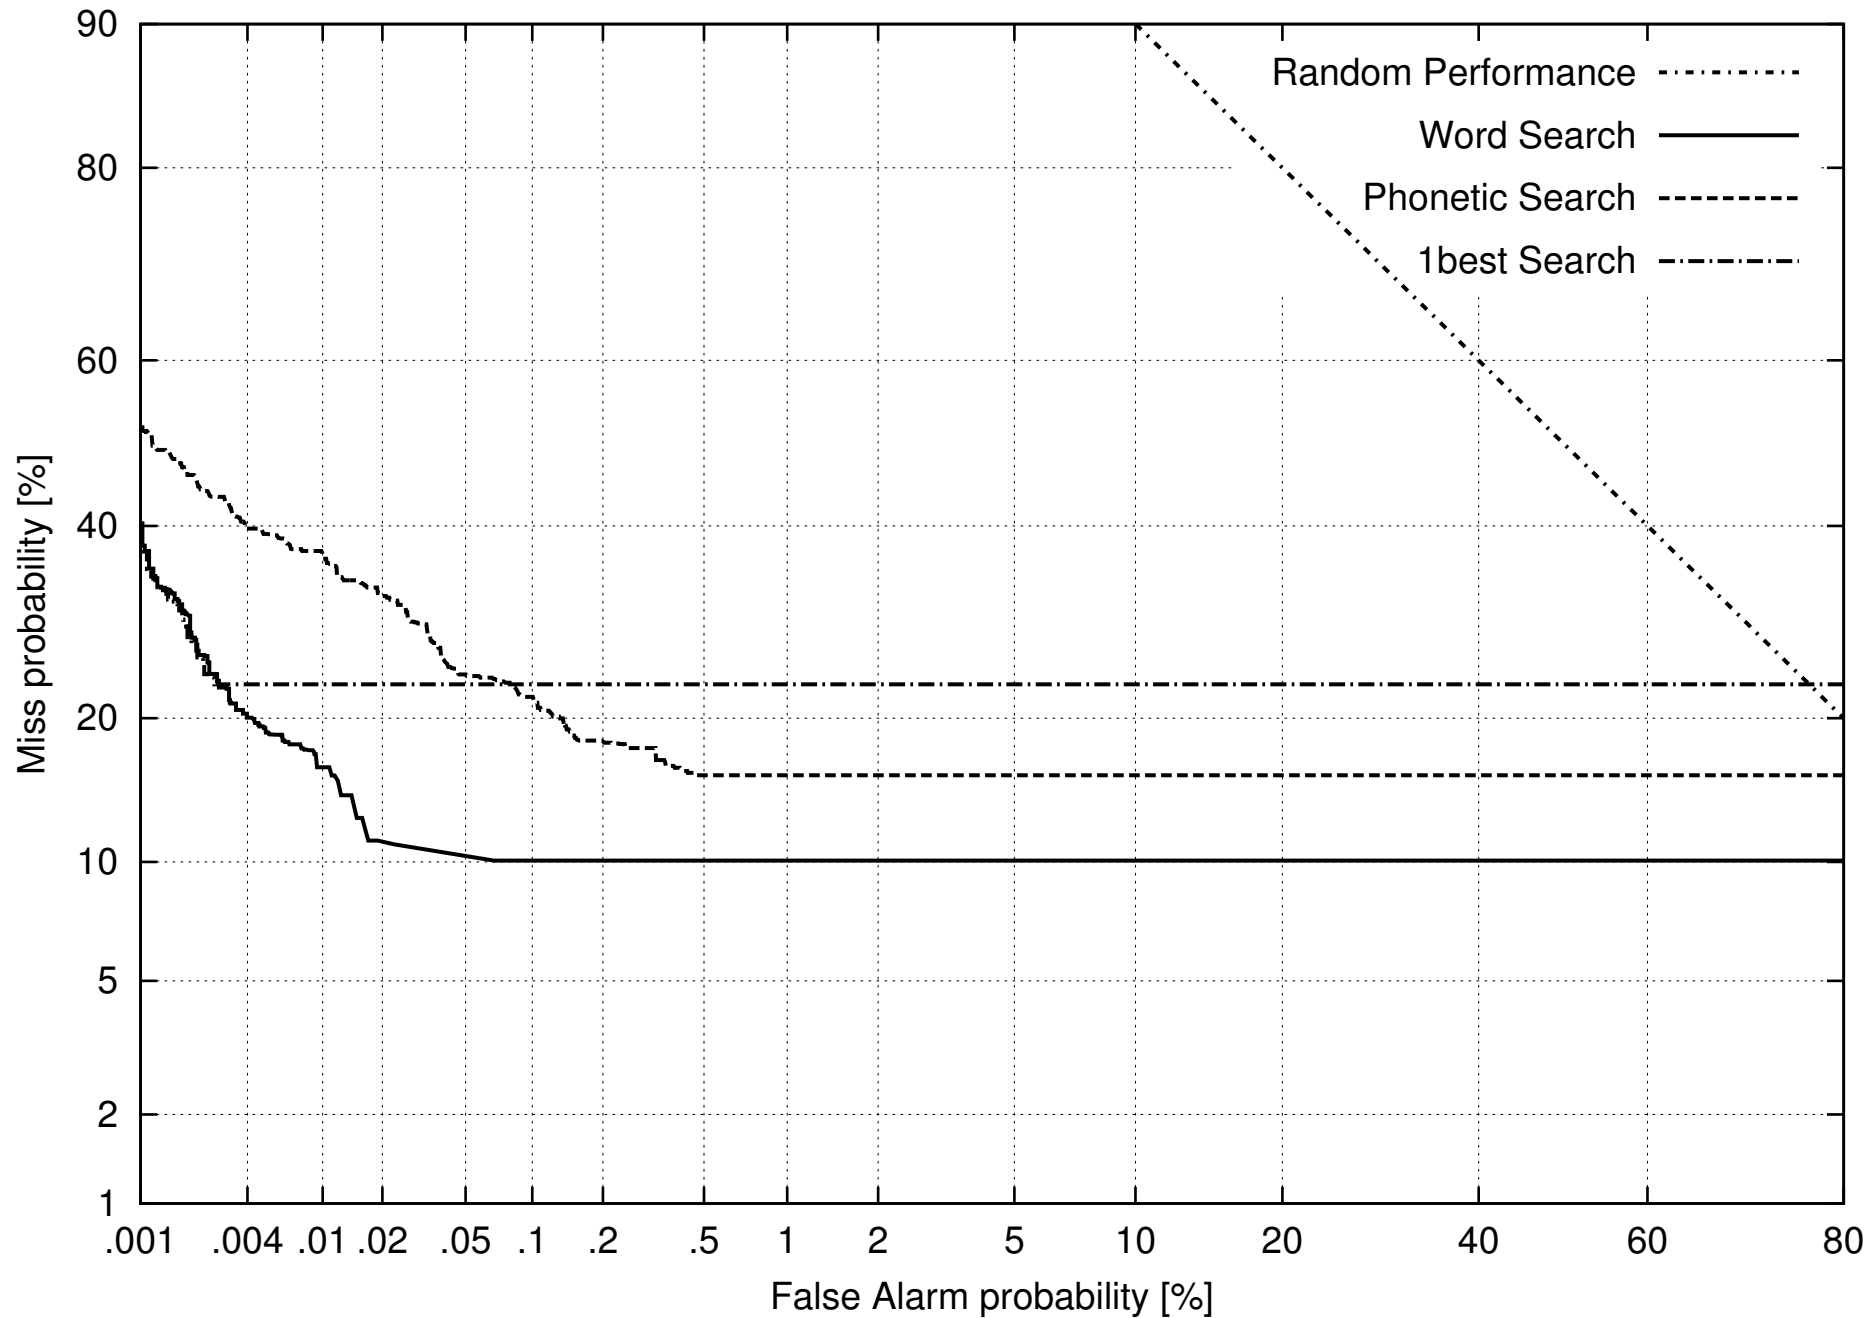

Supplement: 13636_2011_35_MOESM2_ESM.pdf [file 13636_2011_35_MOESM2_ESM.pdf]
